# Supplementary material
Source: publisher site journal article supplement (https://www.dovepress.com/article/488866)
Supplement: Supplementary file 1 [file get_supplementary_file.php]

Supplementary Table 1 A list of all ECs consulted, and their dates of approval is summarized in the table below:

| **Site Number** | **Site Name** | **Ethics Committees** | **EC approval date for Protocol Version 1.0** |
| --- | --- | --- | --- |
|  | Nirmal Hospital Pvt Ltd, Ring Road,Surat- 395002, Gujarat, India | NIRMAL HOSPITAL ETHICS COMMITTEE NIRMAL HOSPITAL PVT. LTD. 2/1423-8-6 SAGRAMPURA RING ROAD NEAR CENTRE POINT SURAT 395002 GUJARAT SURAT Surat Gujarat - 395002 India | 11-May-21 |
|  | Adichunchanagiri Hospital & Research Centre, B G Nagara, Nagamangala Taluk, Mandya District, Karnataka- 571448 | IEC Adichunchanagiri Institute of Medical Sciences, Adichunchanagiri Institute Of Medical Sciences Adichunchanagiri Institute Of Medical Sciences B G Nagara B G NAGARA Mandya Karnataka - 571448 | 7-May-21 |
|  | GMERS Medical College and Civil Hospital Sola, Nr. Gujarat Highcourt, S G Highway, Sola, Ahmedabad, 380060, Gujarat- India | Institutional Ethics Committee GMERS medical college Sola S-G Highway Near Gujarat High court Ahmedabad Ahmedabad Gujarat - 380061 India | 9-Oct-21 |
|  | JPM Rotary Club Of Cuttack Eye Hospital and Research Institute, CDA, Sector-VI, Markat Nagar, Cuttak- 753014, Odisha- India | Institutional Ethics Committee JPM Rotary Eye Hospital JPM Rotary Eye Hospital CDA. SECTOR-VI, MARKET NAGAR CUTTACK Cuttack Orissa - 753014 India | 24-Nov-21 |
|  | Aakash healthcare Private Limited Hospital Plot, Road No 201, Secror 3, Dwarka, New Delhi- 110075 | Aakash Healthcare Institutional Ethics Committee Aakash Healthcare Super Specialty Hospital Hospital Plot, Road No. 201 Sector 3 Dwarka New Delhi Dwarka North West Delhi Delhi - 110075 India | 21-Jun-21 |
|  | K R Hospital, Mysore Medical College & Research Institute, Deaprtment of Opthalmology, Ground Floor, Ophthalmology Block, Irwin Road, Mysore- 570001, Karnataka, India | IEC-MMC and RI and Associated Hospital Mysore Medical College and Research Institute Mysore Medical College and Research Institute Irwin Road Mysuru Mysuru (Mysore) Karnataka - 570001 India | 17-Jan-22 |
|  | Dr. BR Ambedkar Medical College and Hospital, K G Halli, Banglore- 560045, Karnataka, India | Dr B R Ambedkar Medical College and Hospital Dr B R Ambedkar Medical College and Hospital No 24 Shampura Main Road, Kadugondanahalli Bengaluru, Karnataka 560045 Bangalore Bengaluru (Bangalore) Urban Karnataka - 560045 India | 26-Jul-21 |
|  | M & J Western Regional Institute of Opthalmology, Asarwa, Ahmedabad- 380016, Gujarat, India | INSTITUTIONAL ETHICS COMMITTEE B.J. MEDICAL COLLEGE AND CIVIL HOSPITAL OFFICE OF MEDICAL SUPERINTENDENT CIVIL HOSPITAL Ahmedabad Ahmedabad Gujarat - 380016 India | 19-Jan-22 |
|  | All India Institute of Medical Sciences, R P Centre, Ansari Nagar, New Delhi | Institute Ethics Committee All India Institute of Medical Sciences Old OT Block, Room No. 102, AIIMS Hospital Ansari Nagar, New Delhi-29 New Delhi South Delhi Delhi - 110029 India | 24-Feb-22 |
|  | Sankara Nethralaya, 41/18, College Road, Nunganbakkan, Chennai-600006, Tamil Nadu India | Institutional Review Board - Ethics Committee Vision Research Foundation New No.41, Old No.18 College Road Nungambakkam Chennai Chennai Tamil Nadu - 600006 India | 6-Oct-21 |
|  | Nil Ratan Sarkar Medical College and Hospital,Kolkata, 138, Acharya Jagadish Chadra Bose Rd, Sealdah, Raja Bazar, Kolkata West Bengal- 700014, India | Ethics Committee, N.R.S. Medical College NRS Medical College And Hospital NRS Medical College 138, A.J.C Bose Road Kolkata Kolkata West Bengal - 700014 India | 26-Oct-21 |
|  | Kar Vision Eye Hospital, 10, Janpath Rd, Satya Nagar, Bhubaneswar, Odisha- 751007 | Institutional Ethics Committee JPM Rotary Eye Hospital JPM Rotary Eye Hospital CDA. SECTOR-VI, MARKET NAGAR CUTTACK Cuttack Orissa - 753014 India | 8-Sep-21 |
|  | All India Institute of Medical Sciences, Nagpur, Plot No. 02, Sector 20, MIHAN, Nagpur, Maharashtra- 441108 | Institutional Ethics Committee for Clinical Trial All India Institute of Medical Sciences, Nagpur M/S Director AIIMS, Plot No 2, Sector 20 1st floor, OPD building, MIHAN, Nagpur Nagpur Nagpur Maharashtra - 441108 India | 2-Feb-22 |
|  | Dr. R.S.P.R. Govt. Regional Eye Hospital, Opposite Bullayya College, Resapuvanipalem, Vishakhapatnam- 530013, Andhra Pradesh India | IEC King George hospital Kinggeorgehospital Maharanipeta Collectorofficejunction Visakhapatnam Visakhapatnam Andhra Pradesh - 530002 India | 22-May-21 |
|  | Sardar Patel Medical College,Department of Opthalmology, Bikaner | Ethics Committee, S.P. Medical College, Bikaner S.P. Medical College, Bikaner S.P.Medical College, Bikaner Pawanpuri, Bikaner Bikaner Bikaner Rajasthan - 334003 India | 18-Oct-21 |
|  | All India Institute of Medical Sciences, Department of Opthalmology, Bansi, Phase-2, Jodhpur, Rajasthan-342005 | Institutional Human Ethics Committee, All India Institute of Medical Sciences, Bansi, Jodhpur Jodhpur, Rajasthan-342005 India | 2-Feb-22 |
|  | Netralaya Superspeciallity Hospital, 1st Floor, Kaydee House, Above Union Bank of India, Opp. Gujarat Gas, Parimal Garden Cross Road, C G Road, Ahmedabad- 380006, Gujarat, India | Ethics Committee of CIMS Care Institute of Medical Sciences Care Institute of Medical Sciences Nr. Shukan Mall, Off Science City Road, Sola Ahmedabad Ahmedabad Gujarat - 380060 India | 6-Dec-21 |
|  | P.N. Desai Eye Hospital, 4, LK Society, B/h, Sunset Row House, Next to sterling Hospital, Gurukul Road, Memnagar, Ahmedabad- 380052 | Sangini Hospital Ethics Committee Sangini Hospital Santorini Square, B/H Abhishree Complex Opp. Star Bazar Nr Jodhpur Crossroads Satellite Ahmedabad Ahmedabad Gujarat - 380015 India | 13-Jan-22 |
|  | Daulat' Deshmukh Eye Hospital, Khaperde Gardens Amravati, MS- 444601, India | Veracity Independent Ethics Committee Veracity Independent Ethics Committee Rock Arcad, Shop No. 55, Camp Road (Block) Tapowan Road Amravati Amravati Maharashtra - 444602 India | 1-Mar-22 |
